# Supplementary material for: High efficiency electron field emission from protruded graphene oxide nanosheets supported on sharp silicon nanowires
Source: Royal Society of Chemistry journal article supplement (doi:10.1039/c3tc30904e), 2013-01-01
Supplement: c3tc30904e.pdf [file c3tc30904e.pdf]

## Supporting information

### High Efficiency Electron Field Emission from Protruded Graphene Oxide Nanosheets Supported on Sharp Silicon Nanowires

Rami reddy Devarapalli <sup>a</sup>, Ranjit V.Kashid <sup>c</sup>, Ashvini B. Deshmukh <sup>a</sup>, Ponchami Sharma <sup>d</sup> Manash R. Das <sup>d</sup>, Mahendra A.More <sup>c</sup>, Manjusha V. Shelke <sup>ab\*</sup>

Field emission plot of the GO sheets:

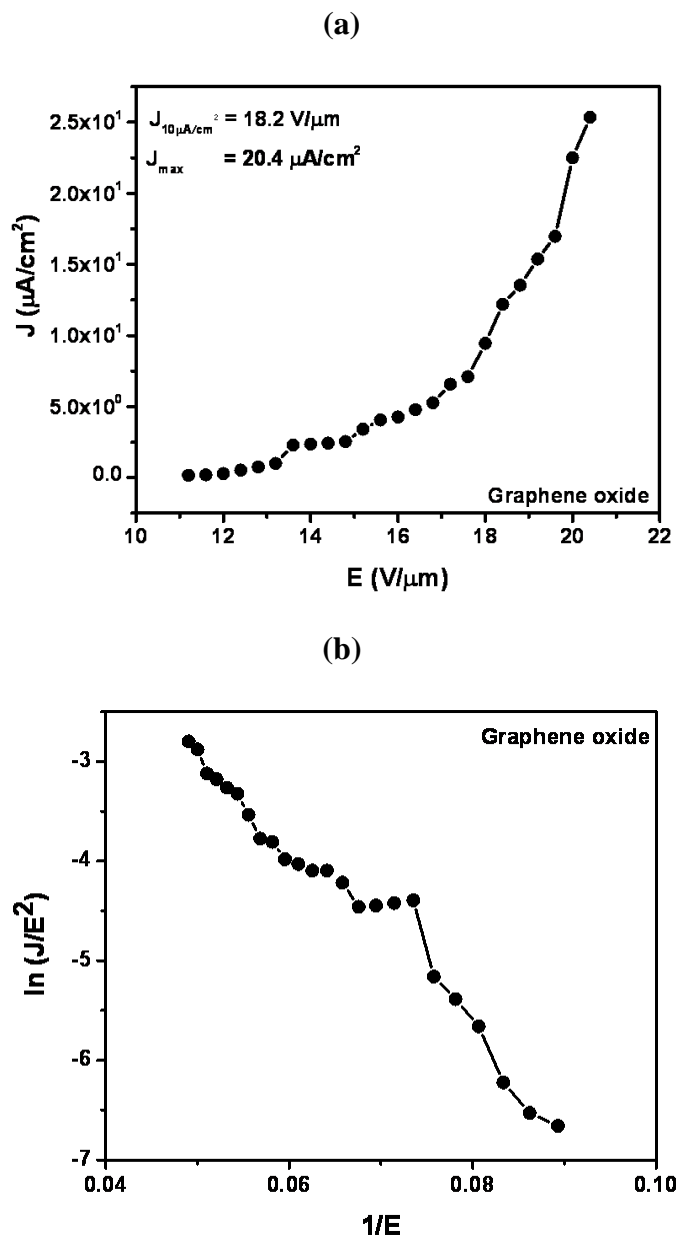

Figure S1 (a) Field emission current density ( $J$ ) versus applied electric field ( $E$ ), and (b) the corresponding F-N plot, of GO sheets
